# Supplementary material for: Low-temperature sprayed SnOx nanocomposite films with enhanced hole blocking for efficient large area perovskite solar cells
Source: Royal Society of Chemistry journal article supplement (doi:10.1039/d1ta05969f), 2021-01-01
Supplement: d1ta05969f1.pdf [file d1ta05969f1.pdf]

# Low-Temperature, Sprayed SnO<sub>x</sub> Nanocomposite Films with Enhanced Hole Blocking for Efficient Large Area Perovskite Solar Cells

*Jinbao Zhang,<sup>a,d</sup> Yichuan Ding,<sup>a</sup> Guochen Jiang,<sup>a,e</sup> Austin Cristobal Flick,<sup>a</sup> Ziyi Pan,<sup>b</sup>*

*William J. Scheideler,<sup>a,f</sup> Oliver Zhao,<sup>a</sup> Justin P. Chen,<sup>a</sup> Li Yang,<sup>d</sup> Nicholas Rolston,<sup>c</sup>*

*Reinhold H. Dauskardt<sup>a\*</sup>*

<sup>a</sup> Department of Materials Science and Engineering  
Stanford University, Stanford, CA 94305-2205, United States  
E-mail: rhd@stanford.edu

<sup>b</sup> Department of Chemistry  
Stanford University, Stanford, CA 94305-2205, United States

<sup>c</sup> Department of Applied Physics  
Stanford University, Stanford, CA 94305-2205, United States

<sup>d</sup> Now at Department of Materials, Fujian Key Laboratory of Advanced Materials, Xiamen University,  
Xiamen, 361005, Fujian, China

<sup>e</sup> Now at School of Materials Science and Engineering  
Tsinghua University, Beijing, 100084, P. R. China

<sup>f</sup> Now at School of Engineering  
Dartmouth University, Hanover, NH

Keywords: spray coating, SnO<sub>2</sub> nanocomposite, ambient processing, perovskite solar  
modules

## Experimental Section

### 1. *Electrochemical characterization of SnO<sub>2</sub> ETL*

Cyclic voltammetry (CV) was employed to analyze the quality of SnO<sub>2</sub> thin film. In the 3-electrode setup, ITO and ITO coated by SnO<sub>2</sub> films were used as working electrode, Ag/AgCl (3M KCl) as reference electrode, and stainless steel as counter electrode. The electrolyte solution contained 0.1M K<sub>4</sub>Fe(CN)<sub>6</sub> in H<sub>2</sub>O. The scan rates were 50 mV/s in CVs. More details can be found in previous reports.<sup>1</sup> A bias potential was applied to the electrodes and current was recorded. The current generated at the electrode/solution interfaces can qualitatively reflect the compactness (pinhole density) of the SnO<sub>2</sub> thin film.

### 2. *Spray coating of SnO<sub>2</sub> on ITO*

SnO<sub>2</sub> films were prepared using ultrasonic spray coating with a 120 kHz ultrasonic nozzle (Sonotek) which is operated at 1 W with 2 liters per minute (LPM) flow of nitrogen gas. The nozzle is mounted on a PVA Delta 6 robotic gantry. A controlled speed of 25 mm/s was used and the nozzle height was kept at 8 cm above the substrates which were put on a hotplate. The temperature of hotplate, flow rate and spray passes were adjusted to optimize the film quality. Two precursor solutions were used to form nanocrystalline SnO<sub>2</sub> thin films, including SnO<sub>2</sub> nanoparticles (0.1wt%) in an aqueous and a mixed solution (water and isopropanol). The spray rate is ranging from 40uL/min to 60uL/min (40, 45, 50, 60uL/min) and post annealing treatment is done at different temperatures (25°C, 50°C, 60°C, 70°C, 80°C, 100°C, 150°C, 200°C). The number of spray passes is from 0 to 10 layers, the raster line spacing is 0.5mm, and raster line speed is 10cm/s. After that SnCl<sub>2</sub> in isopropanol with varied concentrations (5-20 mM) was sprayed on top of SnO<sub>2</sub> to form nanocomposite. The optimized spray parameters for SnCl<sub>2</sub> is

flow of 50  $\mu\text{L}/\text{min}$ , substrate temperature of 100° C and 2 spray passes. All ITO substrates and ITO/SnO<sub>2</sub> films were treated by UV-Ozone for at least 10 minutes before use in spray coating or solar cells.

### *3. ETL Characterizations*

The nanostructures and film surface morphology were characterized using a high-resolution SEM (FEI Sirion XL30, Thermo Fisher Scientific Inc., US) and an AFM (XE-70, Park Systems, Korea) operated in tapping mode. A surface profilometer (Veeco Dektak 150, Veeco Instruments Inc., US) was used to measure the film thickness with a film edge created by masking a small region. An XPS (PHI 5000 Versaprobe, Physical Electronics Inc., US) using Al-K <sub>$\alpha$</sub>  (1486 eV) X-ray source was employed for characterizing the chemical composition of the films. A Pre-sputtering was applied to remove any surface atmospheric contaminants. The crystallinity of the ETLs on glass substrates were studied using grazing angle X-ray Diffraction (X'Pert Materials Research Diffractometer, PANalytical, Inc., Netherlands) with an incident angle of 3.5 degrees, a step size of 0.02 degree, and a time per step of 0.5 s.

### *4. Perovskite Solar Cell Device Fabrication*

A planar device structure with an n-i-p architecture (ITO glass/SnO<sub>2</sub>/perovskite/HTL/Ag) was used for perovskite solar cells. Specifically, ITO glass was cleaned with water, acetone and isopropanol, respectively. The cleaning time is at least 10 mins for each step. After UV-Ozone treatment of ITO glasses for 10 minutes, a thin SnO<sub>2</sub> ETL was coated on ITO by spraying a precursor solution containing 0.1 wt % SnO<sub>2</sub> nanoparticles in deionized H<sub>2</sub>O (diluted from 15wt% SnO<sub>2</sub> aqueous dispersion). After that, SnCl<sub>2</sub> with different concentration (5mM, 10mM, 20mM) in isopropanol was sprayed on top of SnO<sub>2</sub> to form a nanocomposite structure. The

spray parameters used for SnCl<sub>2</sub> coating is flow of 50 μL/min, substrate temperature of 100° C and 2 spray passes. Then the perovskite film was fabricated on top of ITO/SnO<sub>2</sub> substrates. The details of preparing perovskite solution and perovskite film formation can be found in previous reports.<sup>2</sup> Specifically, 285.5 mg formamidinium iodide (Dyseol), 88.3 mg cesium iodide (Sigma), 686.9 mg lead iodide (TCI), and 187.2 mg of lead bromide (TCI) were dissolved in 1.6 mL of anhydrous N,N-dimethylformamide (DMF) and 0.4 mL dimethylsulfoxide (DMSO) (volume ratio =4 : 1) in a glovebox. The perovskite solution was stirred on hotplate with 60-70 °C for 1-2 hours until fully dissolved. The perovskite thin film was fabricated by one-step method, that is, 50uL of the precursor solution was spun on SnO<sub>2</sub>/SnOx film with a two-step program (1000 rpm for 12 seconds and the second step at 6000 rpm for 30 seconds). During the last 5 seconds of the second step, 100 mL of chlorobenzene (Sigma-Aldrich) was quickly dispensed over the film. The substrates were then placed on a hot plate at 100°C for 30 mins in the glovebox. The HTL solution is made from spiro-OMeTAD with different additives (LiTFSI, tert-butyl pyridine and FK209). Specially, HTL solution contains 72 mg/mL spiro-OMeTAD in chlorobenzene, with the addition of 17.5 μL LiTFSI (from a stock solution in acetonitrile with a concentration of 520 mg/mL), 28.8 μL tert-butyl pyridine or 8 μL FK209 from a stock solution in acetonitrile with concentration of 0.5 M. Afterwards, 50uL HTL solutions were spin coated on the top of the perovskite layer with a speed of 3000 rpm for 30 s. Finally, a 150 nm silver layer (the deposition rate is 0.02 nm/s for first 10 nm, and 0.1nm/s for the other 140 nm) was deposited by thermal evaporation on the HTM layer.

##### *5. Perovskite Solar Cell Module Fabrication*

Creating a monolithic, series-interconnected module requires scribing through three layers: 1) the ITO front electrode (P1); 2) the electron transport layers (ETL), hole transport layers (HTL), and perovskite (P2); and 3) the Ag back electrode (P3). Utilizing laser scribing allows for sub-millimeter wide contacts between cells, reducing the necessary dead area that takes away from the active parts of the device. The P1 scribe through the ITO utilized a belt driven fiber laser (1064 nm) at 25 W and 120 mm/s scribe speed. The P2 scribe used the same belt drive with a CO<sub>2</sub> source (10.6 μm) at 1W and 50 mm/s scribe speed. The P1 scribe involved two adjacent scribe marks for a total width of 180 μm. The P2 scribe involved three adjacent scribe marks for a total width of 200 μm. Rather than using a scribe for the P3, a shadow mask was used to pattern the Ag.

### *6. Device Characterization*

Transmittance absorption spectroscopy was obtained using a spectrophotometer (Agilent Cary 6000i). Steady-state photoluminescence and time-resolved photoluminescence were measured using a Horiba FluoroLog fluorimeter. Test device architectures of glass/ETL/perovskite were excited with a 635 nm laser (Picoquant P-C-635M and PDL 800-B operating at 2.5 MHz and  $8 \times 10^{-5}$  Watts per cm<sup>2</sup> average intensity). A Time-Correlated Single Photon Counting (TCSPC) method was used for lifetime measurements. The perovskite solar cells were tested in ambient conditions (~ 45% RH, 25° C) under 1 sun, AM 1.5G illumination from a 300 W xenon lamp (Oriel) solar simulator. The lamp intensity was set based on an NREL-calibrated KG5 filtered Si reference cell. J-V curves were collected with a Keithley Model 2400 digital multimeter. The J-V scans are performed from 1.2 V to 0 V (backward) and 0V to 1.2 V (forward) with a scan rate of 0.1 V/s. The devices are kept in dark glove box at room temperature before J-V

measurements. Max Power Point (MPPT) measurements were obtained using a perturb-and-measure program with voltage steps of 5 mV and a measurement taken every 1 s.

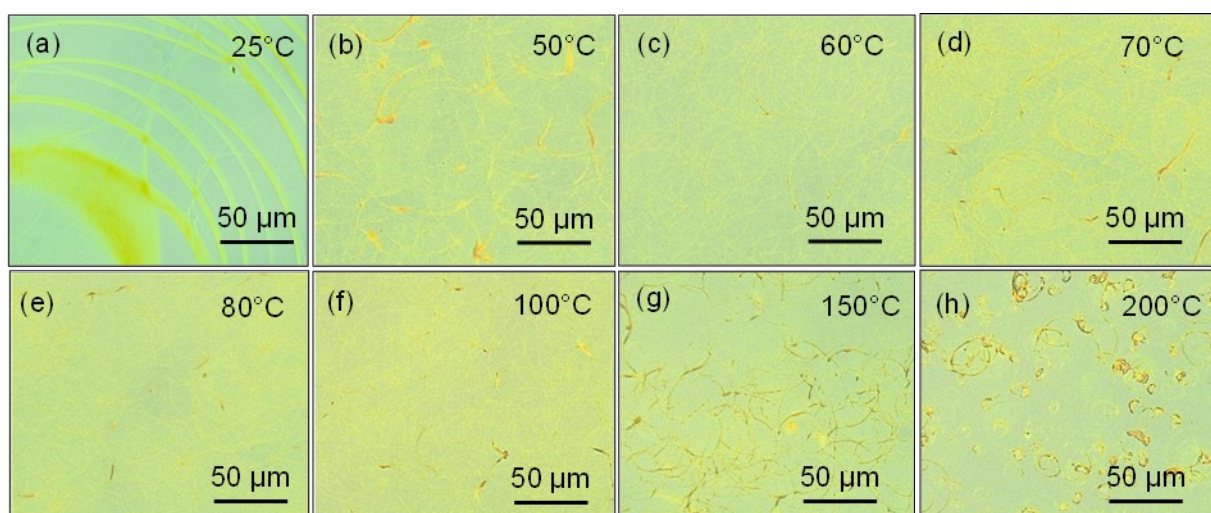

Figure S1. Temperature optimization for aqueous SnO<sub>2</sub> spray coating process.

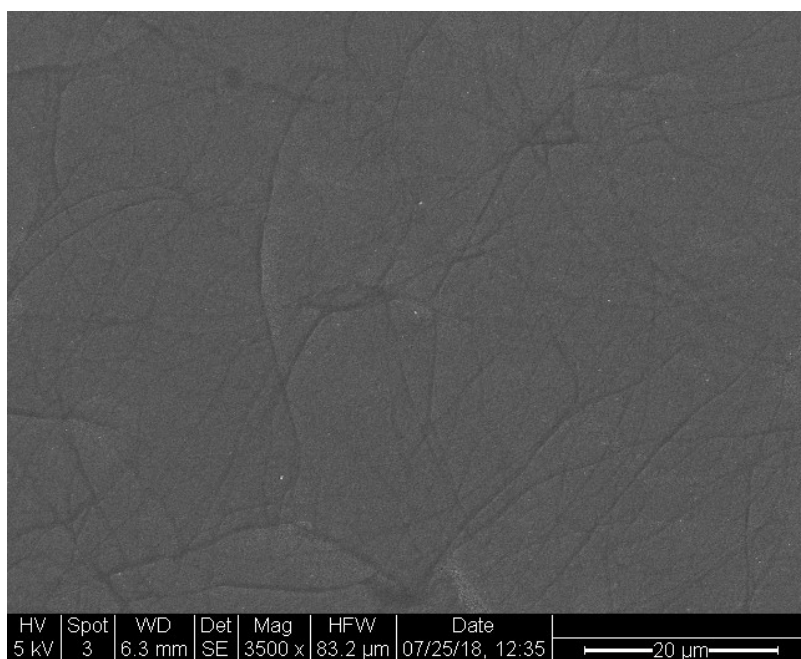

Figure S2. Top view of SEM images of sprayed a-SnO<sub>2</sub>.

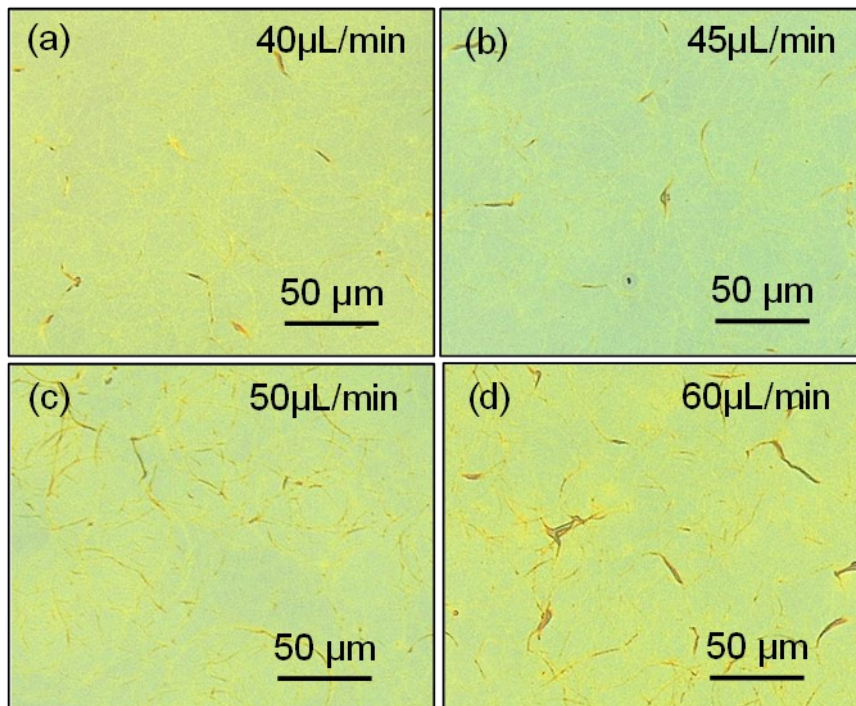

Figure S3. Solution flow optimization for aqueous SnO<sub>2</sub> spray coating process.



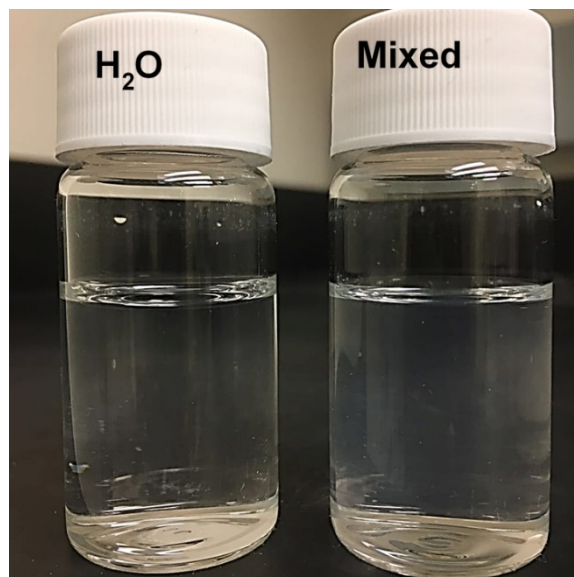

Figure S4. Images of SnO<sub>2</sub> precursor solution in H<sub>2</sub>O and mixed solvents (H<sub>2</sub>O and IPA, v:v =1:1).

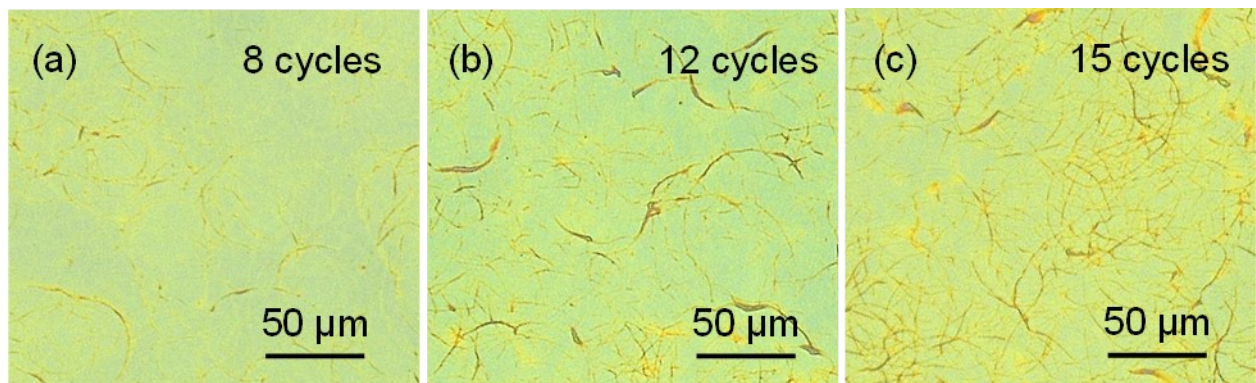

Figure S5. Solution flow optimization for aqueous SnO<sub>2</sub> spray coating process.

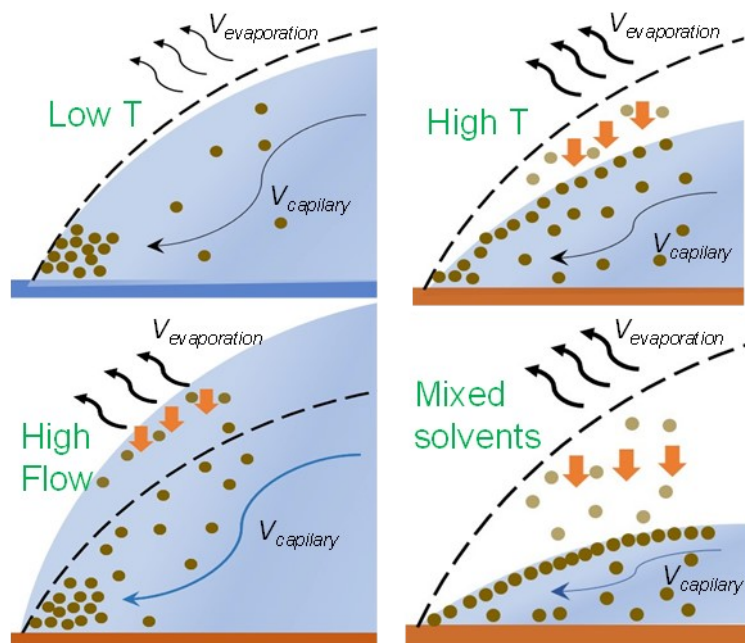

Figure S6. Solution flow optimization for aqueous  $\text{SnO}_2$  spray coating process.

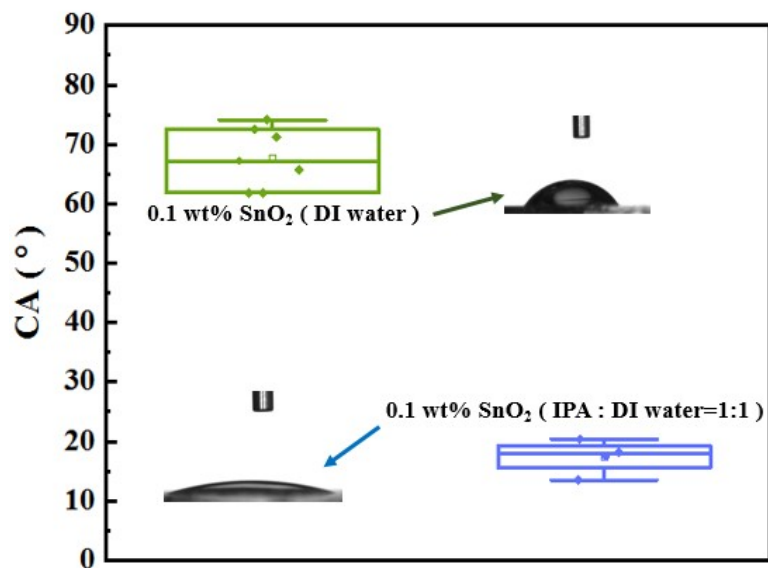

Figure S7. Contact angle of the different SnO<sub>2</sub> Solutions (0.1wt% in deionized water and 0.1wt% in mixture of deionized water and isopropanol with volume ratio of 1:1) on glass substrate.

Table S1. Photovoltaic parameters for champion solar cells based on sprayed SnO<sub>2</sub>

| cycles | thickness /nm | $V_{oc}$ / mV | $J_{sc}$ / mAcm <sup>-2</sup> | FF   | $\eta$ / % |
|--------|---------------|---------------|-------------------------------|------|------------|
| 2      | 14            | 867           | 19.6                          | 0.62 | 10.5       |
| 4      | 24            | 905           | 21.3                          | 0.61 | 11.7       |
| 6      | 37            | 936           | 21.4                          | 0.64 | 12.9       |
| 8      | 47            | 957           | 22.2                          | 0.62 | 13.1       |
| 10     | 50            | 988           | 21.8                          | 0.63 | 13.5       |
| mixed  | -             | 1055          | 20.9                          | 0.72 | 15.9       |

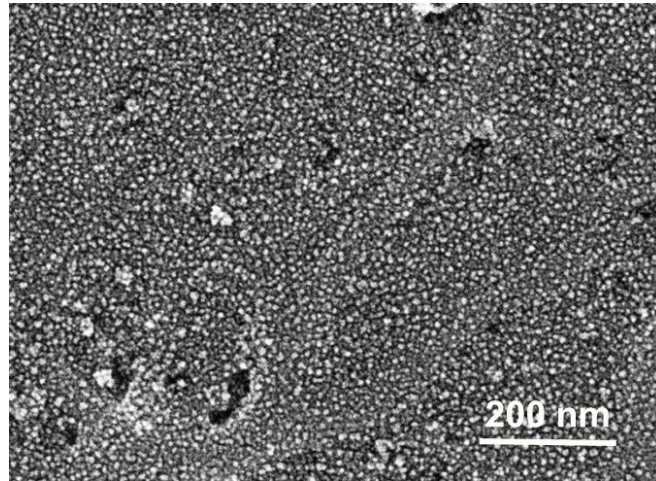

Figure S8. SEM image of bilayer SnO<sub>2</sub>.

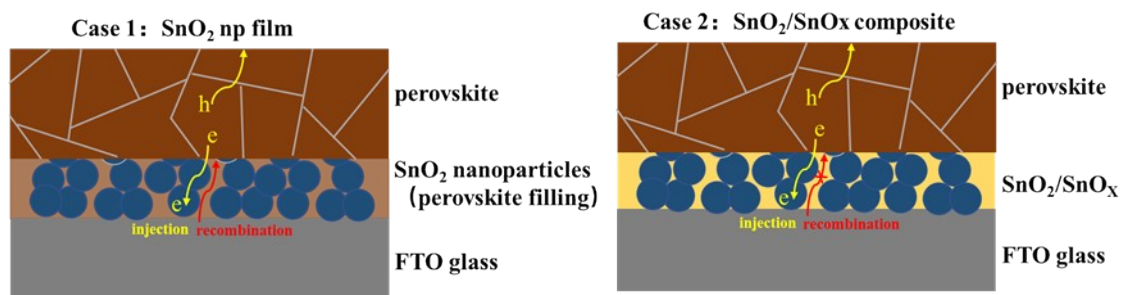

Figure S9. Charge recombination processes in devices based on SnO<sub>2</sub> nanoparticles and SnO<sub>2</sub>/SnO<sub>x</sub> composite.

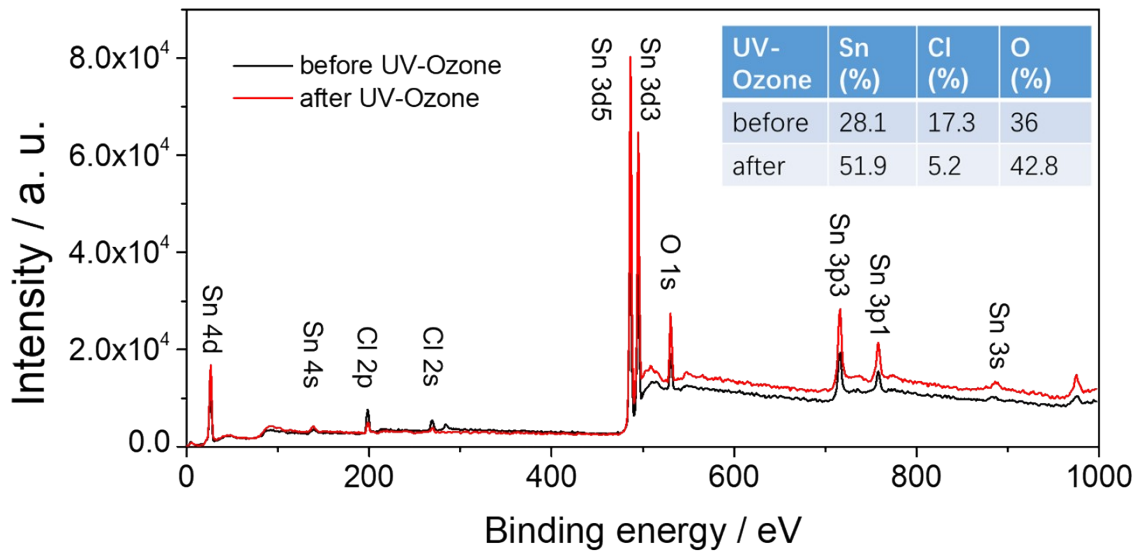

Figure S10. XPS of SnOx before and after UV-Ozone treatment.

Table S2. Photovoltaic parameters for champion solar cells based on bi-SnO<sub>2</sub>

| SnCl <sub>2</sub> | $V_{oc}$ / mV | $J_{sc}$ / mAcm <sup>-2</sup> | FF   | $\eta$ / % |
|-------------------|---------------|-------------------------------|------|------------|
| 5mM               | 1066          | 20.5                          | 0.76 | 16.5       |
| 10mM              | 1110          | 22.4                          | 0.74 | 18.4       |
| 20mM              | 1093          | 21.6                          | 0.73 | 17.2       |



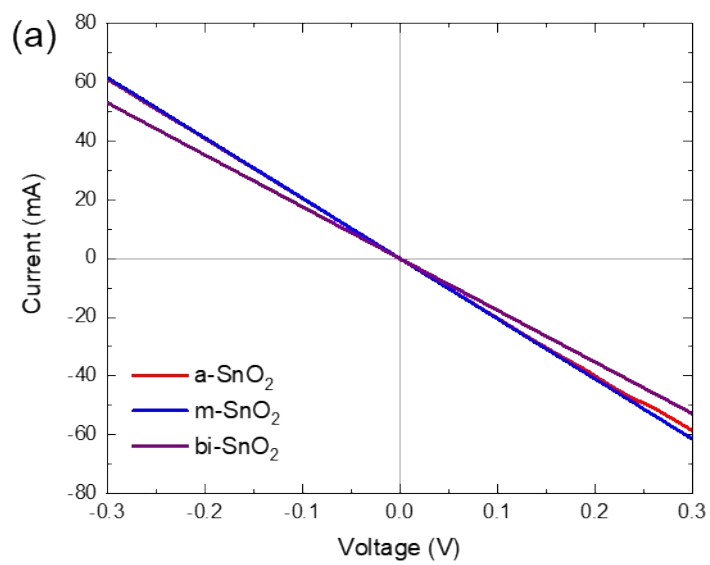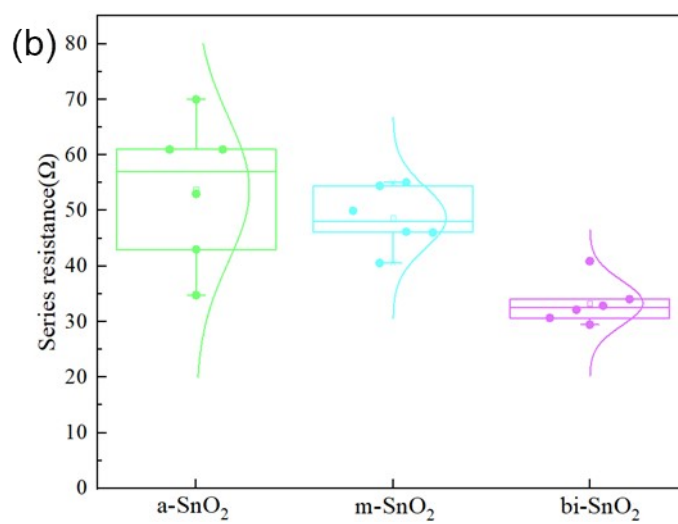

Figure S11. (a) I-V curves of ITO/ETL/Ag (ETL: a-SnO<sub>2</sub>, m-SnO<sub>2</sub> and bi-SnO<sub>2</sub>). (b) Series resistance for devices based on the optimized a-SnO<sub>2</sub>, m-SnO<sub>2</sub> and bi-SnO<sub>2</sub>.

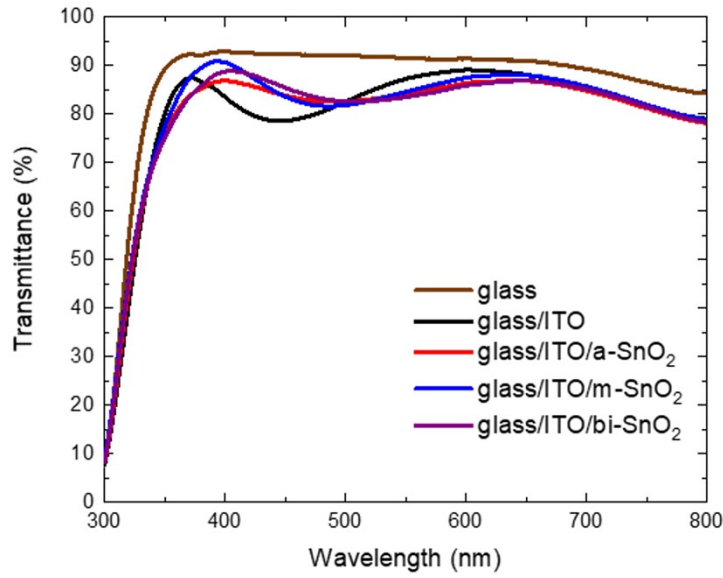

Figure S12. Transmittance spectra of three types of SnO<sub>2</sub> ETLs on ITO glasses.

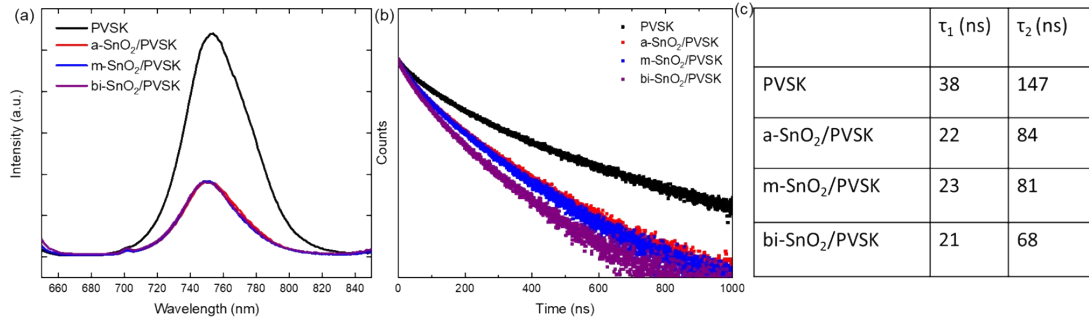

Figure S13. (a) Steady-state photoluminescence (PL) and (b) time-resolved photoluminescence (TRPL) characterizations for perovskite films based on a-SnO<sub>2</sub>, m-SnO<sub>2</sub>, and bi-SnO<sub>2</sub> ETL.

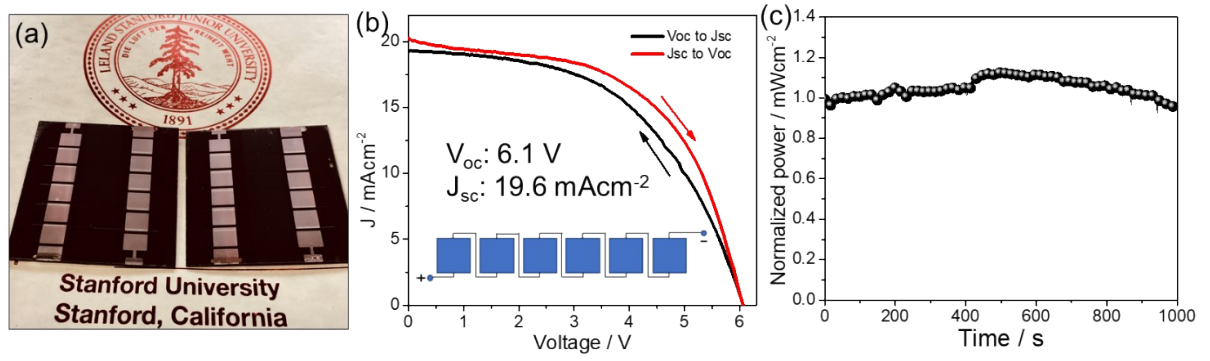

Figure S14. Perovskite solar cell modules based on sprayed SnO<sub>2</sub> nanocomposite. (a) Image of series-connected modules with 6 subcells on a 5x5 cm<sup>2</sup> ITO substrate. (b) J-V curves of the perovskite solar modules with an active area of 0.35 cm<sup>2</sup> per subcell. (c) Normalized power of solar modules under MPP tracking, measured under ambient without encapsulation.

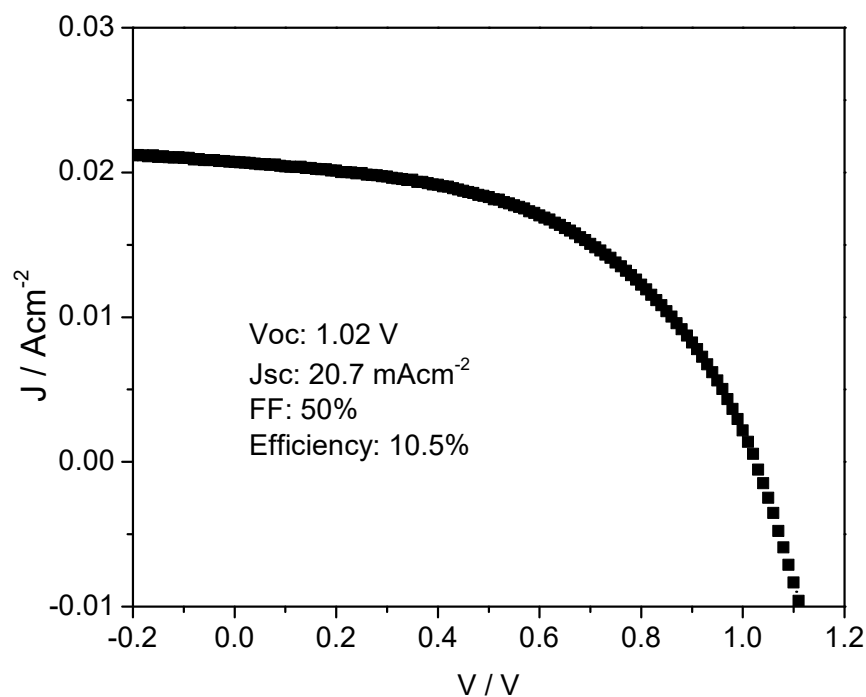

Figure S15. J-V curve of the inverted solar cell device on a 5x5 cm<sup>2</sup> substrate. The device structure is ITO/NiO/perovskite/C60/BCP/Ag. The perovskite is made by spin coating, and the active area for measuring is 0.23 cm<sup>2</sup>.

#### References:

- (1) Zhang, J. B.; Hultqvist, A.; Zhang, T.; Jiang, L. C.; Ruan, C. Q.; Yang, L.; Cheng, Y. B.; Edoff, M.; Johansson, E. M. J. Al<sub>2</sub>O<sub>3</sub> Underlayer Prepared by Atomic Layer Deposition for Efficient Perovskite Solar Cells. *Chemsuschem* **2017**, *10*, 3810-3817.
- (2) Chen, J. P.; Hilt, F.; Rolston, N.; Dauskardt, R. H. Scalable open-air deposition of compact ETL TiO<sub>x</sub> on perovskite for fullerene-free solar cells. *J. Mater. Chem. A*, **2020**, *8*, 22858-22866.
